# Supplementary material for: Neonatal and adult recent thymic emigrants produce IL-8 and express complement receptors CR1 and CR2
Source: PubMed Central journal article supplement (PMC5621870; doi:10.1172/jci.insight.93739), 2017-08-17
Supplement: jciinsight-2-93739-s019.pdf [file jciinsight-2-93739-s019.pdf]

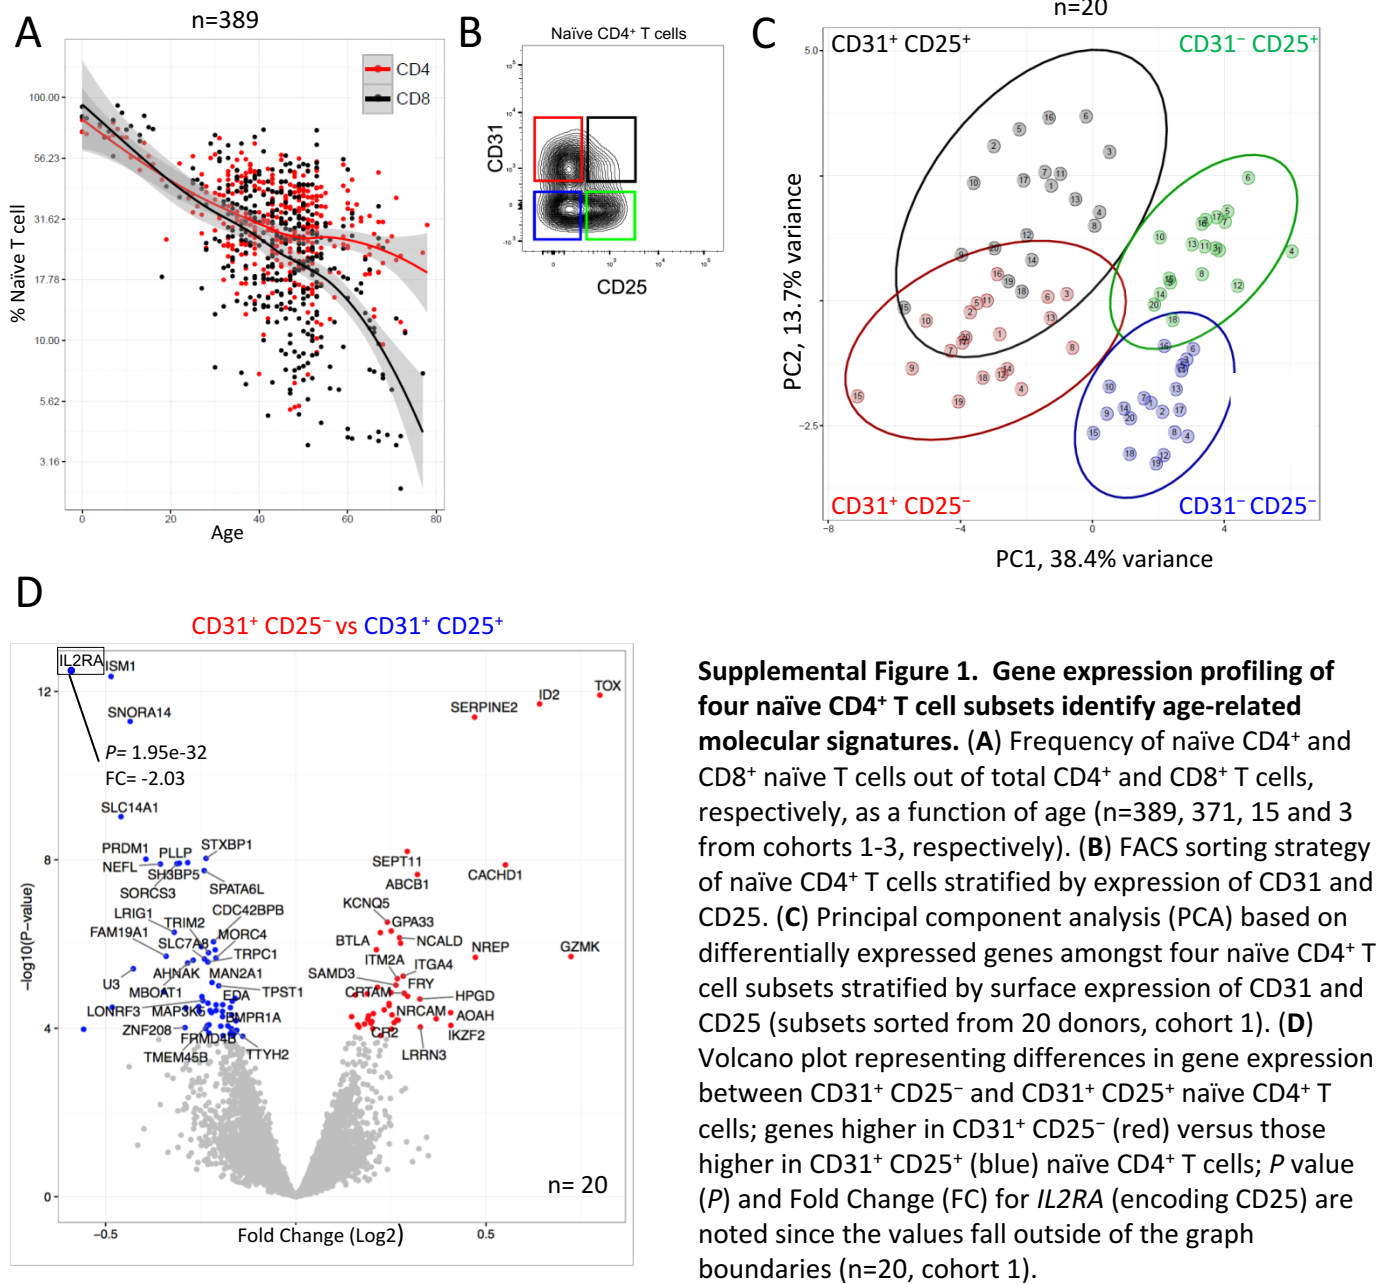

**Supplemental Figure 1. Gene expression profiling of four naïve CD4<sup>+</sup> T cell subsets identify age-related molecular signatures.** (A) Frequency of naïve CD4<sup>+</sup> and CD8<sup>+</sup> naïve T cells out of total CD4<sup>+</sup> and CD8<sup>+</sup> T cells, respectively, as a function of age ( $n=389$ , 371, 15 and 3 from cohorts 1-3, respectively). (B) FACS sorting strategy of naïve CD4<sup>+</sup> T cells stratified by expression of CD31 and CD25. (C) Principal component analysis (PCA) based on differentially expressed genes amongst four naïve CD4<sup>+</sup> T cell subsets stratified by surface expression of CD31 and CD25 (subsets sorted from 20 donors, cohort 1). (D) Volcano plot representing differences in gene expression between CD31<sup>+</sup> CD25<sup>-</sup> and CD31<sup>+</sup> CD25<sup>+</sup> naïve CD4<sup>+</sup> T cells; genes higher in CD31<sup>+</sup> CD25<sup>-</sup> (red) versus those higher in CD31<sup>+</sup> CD25<sup>+</sup> (blue) naïve CD4<sup>+</sup> T cells;  $P$  value ( $P$ ) and Fold Change (FC) for *IL2RA* (encoding CD25) are noted since the values fall outside of the graph boundaries ( $n=20$ , cohort 1).

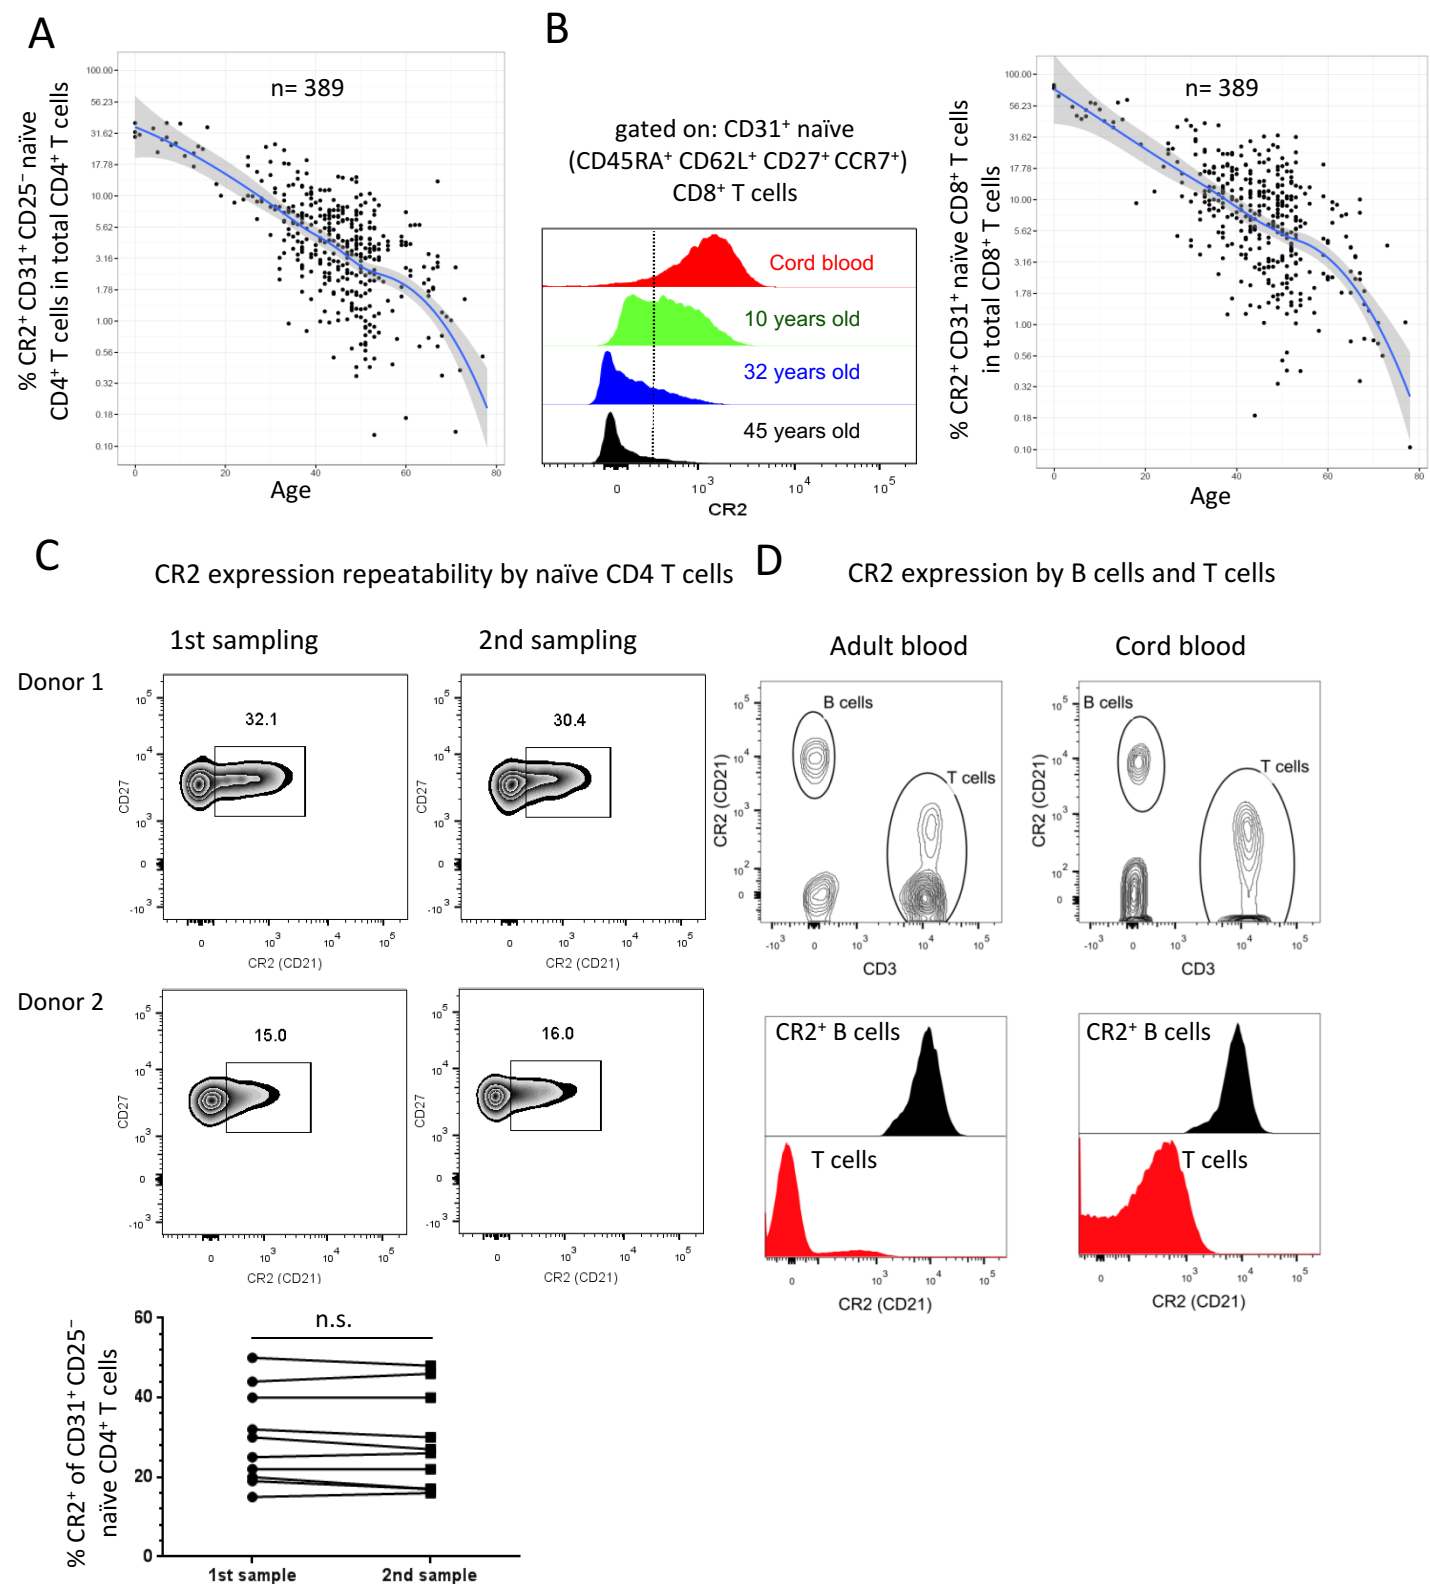

**Supplemental Figure 2. CR2 protein expression in recent thymic emigrants.** (A) The frequency of CD31<sup>+</sup> CD25<sup>-</sup> naïve CD4<sup>+</sup> T cells out of total CD4<sup>+</sup> T cells that are CR2<sup>+</sup> as a function of age (n=389; 371, 15 and 3 donors from cohorts 1-3, respectively). (B) Representative examples of CR2 expression on naïve CD8<sup>+</sup> T cells and the frequency of CD31<sup>+</sup> naïve CD8<sup>+</sup> T cells out of total CD8<sup>+</sup> T cells that are CR2<sup>+</sup> as a function of age (see Supplemental Figure 5B for gating strategy of naïve CD8<sup>+</sup> T cells). (C) Two representative examples and compiled data (paired t test) from ten donors (a subset of the 371 immunophenotyped donors in cohort 1) assessed for CR2 on CD31<sup>+</sup> CD25<sup>-</sup> naïve CD4<sup>+</sup> T cells on two occasions (11 to 17 months between samples). (D) A comparison of cell-surface CR2 expression on T cells and CR2<sup>+</sup> B cells (representative examples from cohorts 1 and 2).

A

| Patient ID | CD4 T cell total count at Baseline million/ml | CD4 T cell count reconstituted at 12 month million/ml [% of Baseline] | Naïve CD4 T cell count at Baseline million/ml | Naïve CD4 T cell count reconstituted at 12 months million/ml [% of Baseline] | CR2+ CD4 naïve T cells at Baseline % of CD31+ CD25- cells |
|------------|-----------------------------------------------|-----------------------------------------------------------------------|-----------------------------------------------|------------------------------------------------------------------------------|-----------------------------------------------------------|
| MS-6       | 1.2                                           | 0.18 (15%)                                                            | 0.63                                          | 0.034 (5.4%)                                                                 | 18%                                                       |
| MS-2       | 0.68                                          | 0.14 (21%)                                                            | 0.14                                          | 0.0034 (2.4%)                                                                | 17%                                                       |
| MS-1       | 1.0                                           | 0.17 (17%)                                                            | 0.60                                          | 0.11 (18%)                                                                   | 54%                                                       |
| MS-3       | 0.64                                          | 0.20 (31%)                                                            | 0.32                                          | 0.11 (34%)                                                                   | 40%                                                       |
| MS-4       | 1.3                                           | 0.17 (13%)                                                            | 0.55                                          | 0.071 (13%)                                                                  | 32%                                                       |
| MS-8       | 1.2                                           | 0.37 (31%)                                                            | 0.45                                          | 0.14 (31%)                                                                   | 30%                                                       |
| MS-7       | 0.79                                          | 0.28 (35%)                                                            | 0.28                                          | 0.18 (64%)                                                                   | 41%                                                       |
| MS-5       | 0.85                                          | 0.38 (45%)                                                            | 0.12                                          | 0.072 (60%)                                                                  | 29%                                                       |

CD31<sup>+</sup> naïve CD8<sup>+</sup> T cells (MS patient)%CR2<sup>+</sup> in CD31<sup>+</sup> naïve CD8<sup>+</sup> T cells $P < 0.0001$ 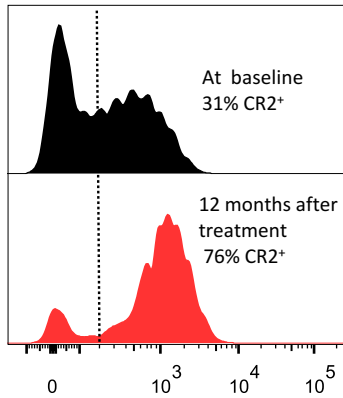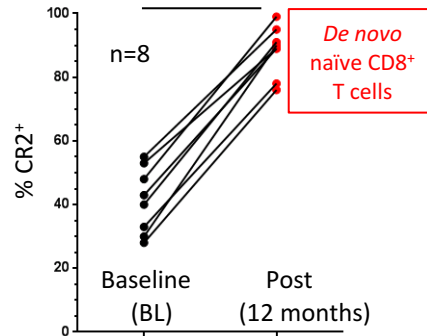

C

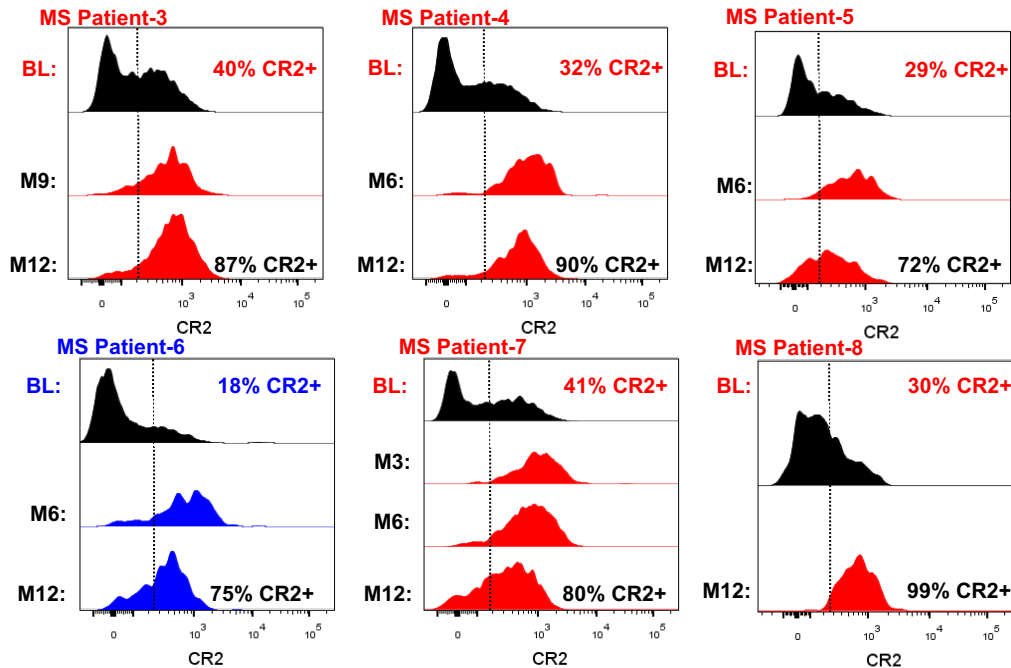

**Supplemental Figure 3. Reconstitution of naïve T cells following lymphocyte depletion in MS patients.** (A) Total and naïve CD4<sup>+</sup> T cell (CD45RA<sup>+</sup> CD62L<sup>+</sup>) counts at baseline (BL), the proportions reconstituted 12 months after depletion and the proportion of CR2<sup>+</sup> cells in the CD31<sup>+</sup> CD25<sup>-</sup> naïve CD4<sup>+</sup> T cell subset at BL are shown for eight patients. (B) Representative example and summary of CR2 expression on CD8<sup>+</sup> naïve T cells at BL and 12 months after reconstitution. (C) CR2 expression profiles of CD31<sup>+</sup> CD25<sup>-</sup> naïve CD4<sup>+</sup> T cells at BL and time points after lymphocyte depletion (see **Figure 3** for two other patients). CR2<sup>+</sup> cell frequencies in the CD31<sup>+</sup> CD25<sup>-</sup> naïve CD4<sup>+</sup> T cell subset are shown at BL and month 12. Profiles depicted in red and blue denote patients with good and poor, respectively, naïve T cell reconstitution at 12 months following depletion (see **Figure S3A** above).

**A**

Naïve CD4<sup>+</sup> T cells in MS patients during *de novo* T cell reconstitution

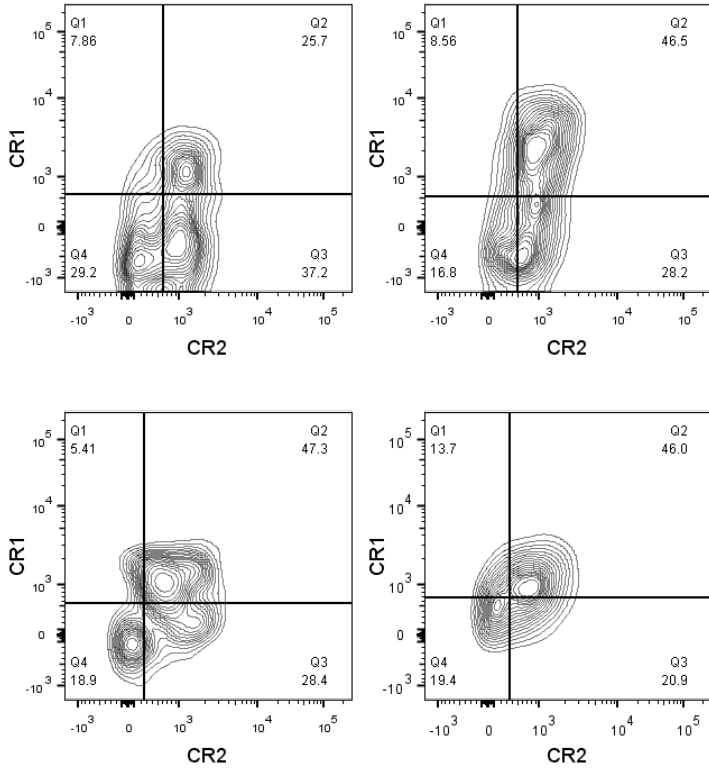

**B**

Naïve CD8<sup>+</sup> T cells from healthy donors

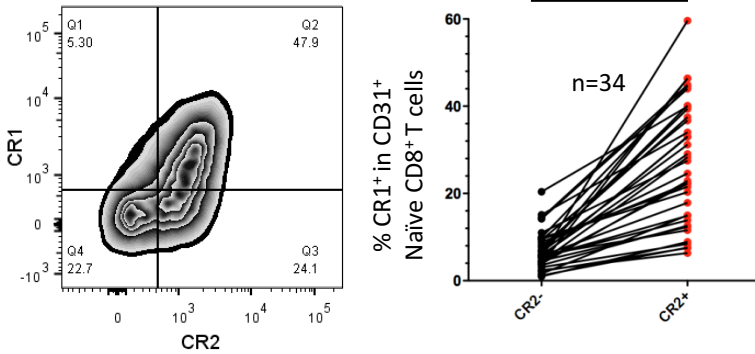

**Supplemental Figure 4. CR2 and CR1 are co-expressed on naïve T cells.** (A) CR1 and CR2 expression on CD31<sup>+</sup> CD25<sup>-</sup> naïve CD4<sup>+</sup> T cells in MS patients (n=4) 6 to 12 months post-alemtuzumab. (B) Representative example and summary analysis of cell-surface CR1 expression on CR2<sup>+</sup> and CR2<sup>-</sup> CD31<sup>+</sup> naïve CD8<sup>+</sup> T cells (n=34, age range 0-67 yr, cohorts 1-3, paired t test). (C) CR2 and CR1 expression on CD31<sup>+</sup> naïve CD8<sup>+</sup> T cells in MS patients (n=3) 6 to 12 months post-alemtuzumab. (D) Number of CR2 and PTK7 transcripts in CR2<sup>+</sup> and CR2<sup>-</sup> naïve CD4<sup>+</sup> T cells (CD31<sup>+</sup>CD25<sup>-</sup>) based on RNA-seq analysis, counts per million reads (cpm); (n=4, age range 30-44, cohorts 1 and 3, paired t test). (E) CR2 is lost from the surface of naïve T cells after 6h of activation with PMA and ionomycin (example from cord blood, cohort 3).

**D**

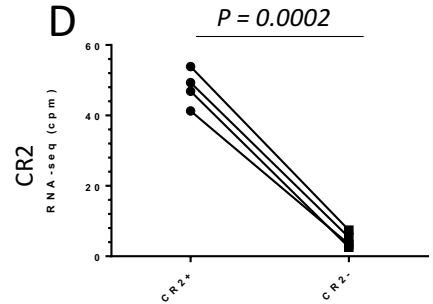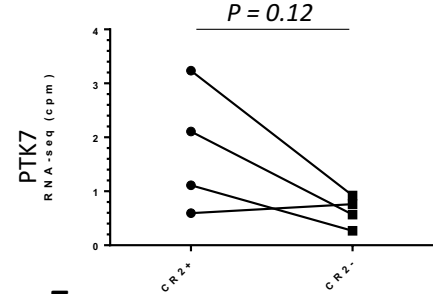

**E**

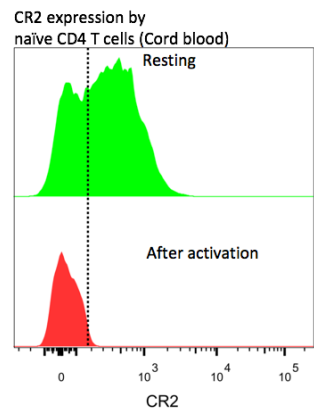

**C**

Naïve CD8<sup>+</sup> T cells in MS patients during *de novo* T cell reconstitution

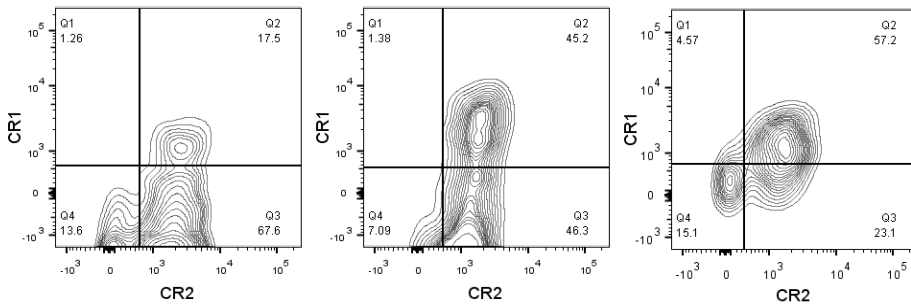

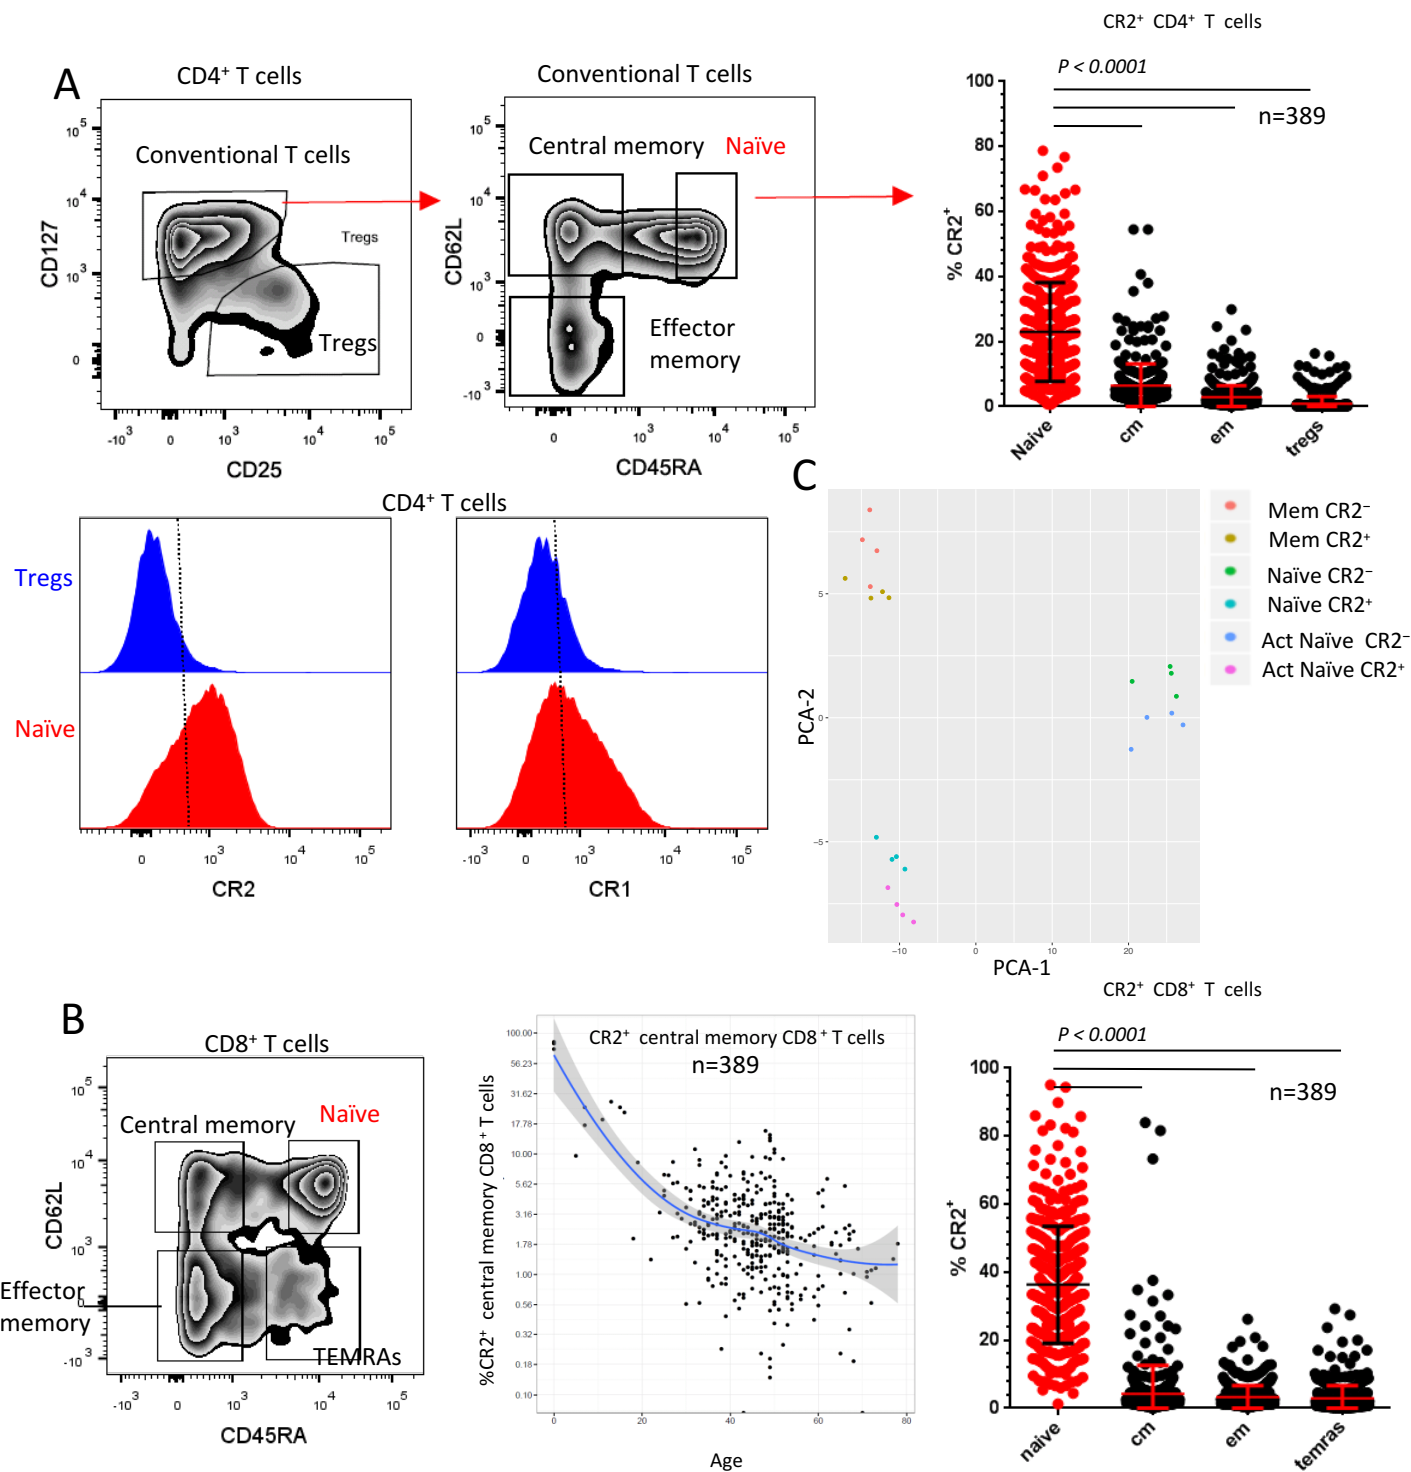

**Supplemental Figure 5. CR2 is expressed by subsets of CD4<sup>+</sup> and CD8<sup>+</sup> memory T cells. (A)** Representative gating of Tregs and naïve, central memory and effector memory CD4<sup>+</sup> T cells and the distribution of CR2<sup>+</sup> cells within each of these subsets (n=389; 371, 15 and 3 from cohorts 1-3, respectively, paired t tests for the comparisons indicated). Representative examples of CR1 and CR2 expression on naïve CD4<sup>+</sup> T cells and CD4<sup>+</sup> Tregs from a donor 10 years of age. **(B)** Representative gating of naïve and memory CD8<sup>+</sup> T cell subsets. CR2 expression on central memory CD8<sup>+</sup> T cells as a function of age. Distribution of CR2<sup>+</sup> cells within naïve and memory CD8<sup>+</sup> T cell subsets (mean ± SD, paired t tests for comparisons) (n=389; 371, 15 and 3 from cohorts 1-3, respectively). **(C)** Principal component analysis (PCA) based on gene expression (NanoString) of CR2<sup>+</sup> and CR2<sup>-</sup> naïve and central memory CD4<sup>+</sup> T cells *ex vivo* and activated CR2<sup>+</sup> and CR2<sup>-</sup> naïve CD4<sup>+</sup> T cells (n=4 adult donors from cohorts 1 and 3).

**Naïve T cell expansion:** lower CR2 expression, inflammasome assembly (PYHIN1, GBP5), higher IFN $\gamma$  and IL-2 production upon activation

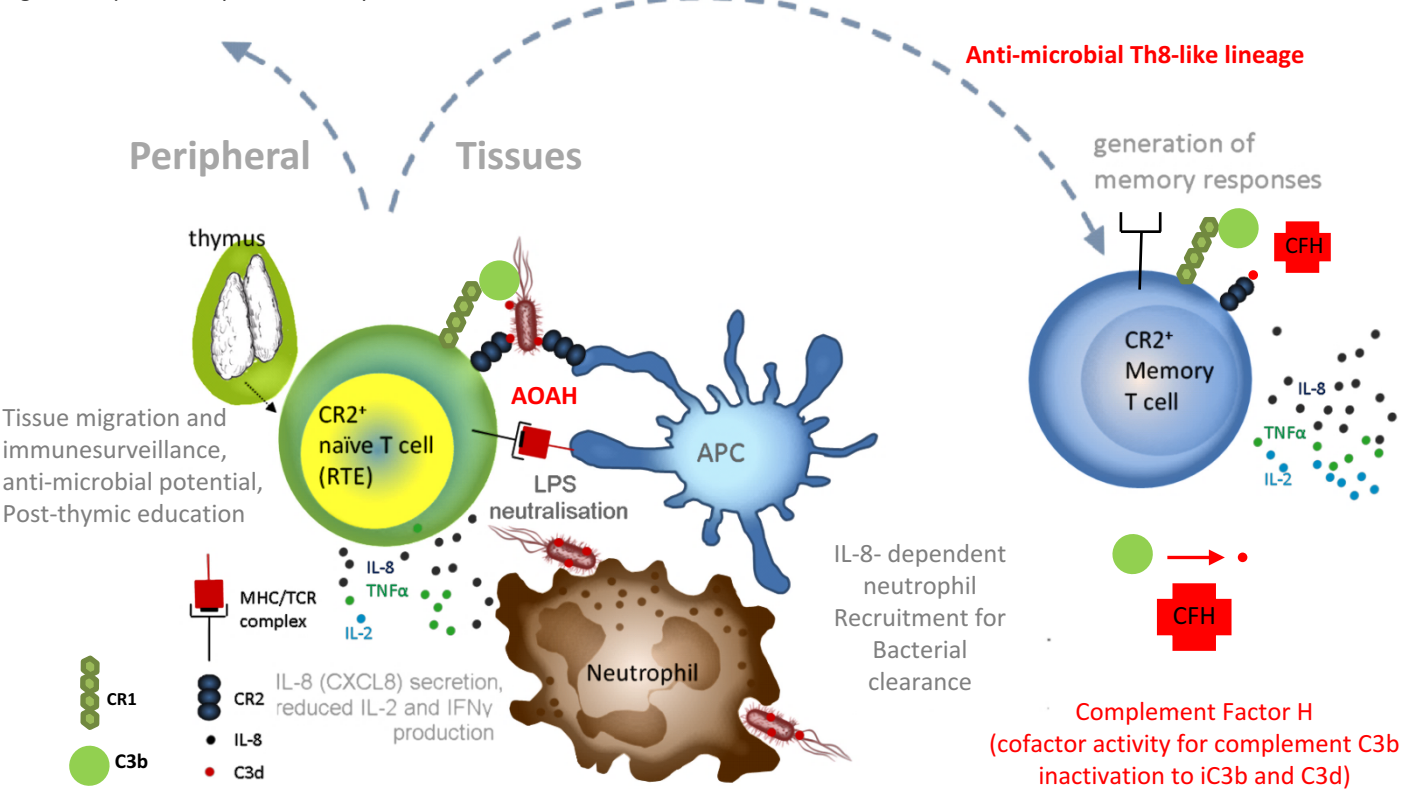

**Differentially expressed genes (Higher expression in CR2<sup>+</sup> vs CR2<sup>-</sup> naïve T cells *ex vivo*)**

*AOAH, ADA, CACHD1, DACH1, FCGRT, ITGA4, ITGA6, TCF4, TLR1, LRRN3, TOX, IKZF2 (HELIOS)*

**Differentially expressed genes (Higher expression in CR2<sup>+</sup> vs CR2<sup>-</sup> memory T cells *ex vivo*)**

*ANK1, TNFSF13B (BAFF), CFH, CD79A, ZBTB16, IL2RA (CD25), NT5E (CD73), IL7R*

**Differentially expressed genes shared between CR2<sup>+</sup> naïve and CR2<sup>+</sup> central memory CD4<sup>+</sup> T cells vs CR2<sup>-</sup> naïve and CR2<sup>-</sup> central memory CD4<sup>+</sup> T cells *ex vivo***

|                        |                                                                                                                                                        |
|------------------------|--------------------------------------------------------------------------------------------------------------------------------------------------------|
| <i>CR1, CR2</i>        | Complement receptors, regulate lymphocyte activation, recognition of microbial products; C3b inactivation                                              |
| <i>ADAM23</i>          | Metalloproteinase, binds to $\alpha\beta3$ integrin, regulates cell-cell and cell-matrix interactions                                                  |
| <i>ARHGAP32 (RICS)</i> | Rho GTPase-activating protein 32 neuron-associated GTPase-activating protein, regulates cell morphology                                                |
| <i>DST</i>             | Dystonin, Bullous pemphigoid antigen; plakin protein family of adhesion junction plaque proteins, potentially aids in migration through tissues        |
| <i>PLXNA4</i>          | Plexin A4 binds to neuropilin 1 (Nrp1) and neuropilin 2 (Nrp2), regulation of cell morphology and migration                                            |
| <i>TNFAIP3</i>         | zinc finger protein and ubiquitin-editing enzyme, attenuates TNF signalling, inhibits NF-kappa B activation as well as inhibits TNF-mediated apoptosis |
| <i>BCL2</i>            | Anti-apoptotic protein                                                                                                                                 |
| <i>CISH</i>            | CISH controls T cell receptor (TCR) signalling and suppressor of cytokine signalling (SOCS), involved in anti-bacterial responses.                     |
| <i>SOCS3</i>           | Suppressor of cytokine signalling 3, inhibition of JAK/STAT activation, regulator of infection and inflammation.                                       |
| <i>ZNF462</i>          | Transcription factor                                                                                                                                   |
|                        | <i>CTLA4, GBP5, GZMK, PYHIN1, SLAMF6</i> ↓                                                                                                             |



## Supplemental Figure 6. Hypothetical model of molecular and cellular interactions occurring in CR2<sup>+</sup> T cells based on gene and protein expression.

Gene names shown in the first two boxes are some of the differentially expressed genes having higher expression in either CR2<sup>+</sup> naïve or CR2<sup>+</sup> memory CD4<sup>+</sup> T cells versus their CR2<sup>-</sup> counterparts. Genes that share their expression patterns in both CR2<sup>+</sup> naïve and memory cells are listed in the larger boxes (genes with higher expression in red, genes with lower expression in blue). We have discovered that CR2<sup>+</sup> T cells express a selection of genes that should give them the potential to migrate to tissue including the gut-homing integrin alpha4 (*ITGA4*) (1) and integrin alpha6 (*ITGA6*, *CD49f*), a hemidesmosomal component important for tissue homing (2, 3). We hypothesize that in the presence of appropriate danger signals and tissue-based antigen-presenting cells, CR2<sup>+</sup> T cells respond to pathogens by mediating IL-8-dependent neutrophil recruitment and differentiating into memory cells, some of which maintain the ability to secrete IL-8. This scenario of priming naïve T cells within tissues is supported by the presence in children of a higher proportion (>35%) of effector memory CD4<sup>+</sup> and CD8<sup>+</sup> T cells in jejunum, ileum and lung tissue samples as compared to lymph nodes (<10% Teff) (4). CR2<sup>+</sup> naïve and memory T cells share the expression of other genes that are involved in cell adhesion and may enhance the migratory properties of the T cells through the basal lamina: *DST* that encodes an adhesion junction protein anchoring intermediate filaments to hemidesmosomes (5, 6), *ARHGAP32* (*RICS*) that regulates neuronal cell morphology and movement (7) and *PLXNA4* that is also involved in nerve fiber guidance (8).

1. Sun H, Liu J, Zheng Y, Pan Y, Zhang K, Chen J. Distinct chemokine signaling regulates integrin ligand specificity to dictate tissue-specific lymphocyte homing. *Dev Cell*. 2014;30(1):61-70.
2. Qian H, Tryggvason K, Jacobsen SE, Ekblom M. Contribution of alpha6 integrins to hematopoietic stem and progenitor cell homing to bone marrow and collaboration with alpha4 integrins. *Blood*. 2006;107(9):3503-3510.
3. Sonawane M, Martin-Maischein H, Schwarz H, Nusslein-Volhard C. Lgl2 and E-cadherin act antagonistically to regulate hemidesmosome formation during epidermal development in zebrafish. *Development*. 2009;136(8):1231-1240.
4. Thome JJ, et al. Early-life compartmentalization of human T cell differentiation and regulatory function in mucosal and lymphoid tissues. *Nat Med*. 2016;22(1):72-77.
5. Koster J, Geerts D, Favre B, Borradori L, Sonnenberg A. Analysis of the interactions between BP180, BP230, plectin and the integrin alpha6beta4 important for hemidesmosome assembly. *J Cell Sci*. 2003;116(Pt 2):387-399.
6. Kunzli K, Favre B, Chofflon M, Borradori L. One gene but different proteins and diseases: the complexity of dystonin and bullous pemphigoid antigen 1. *Exp Dermatol*. 2016;25(1):10-16.
7. Okabe T, et al. RICS, a novel GTPase-activating protein for Cdc42 and Rac1, is involved in the beta-catenin-N-cadherin and N-methyl-D-aspartate receptor signaling. *J Biol Chem*. 2003;278(11):9920-9927.
8. Kong Y, et al. Structural Basis for Plexin Activation and Regulation. *Neuron*. 2016;91(3):548-560.

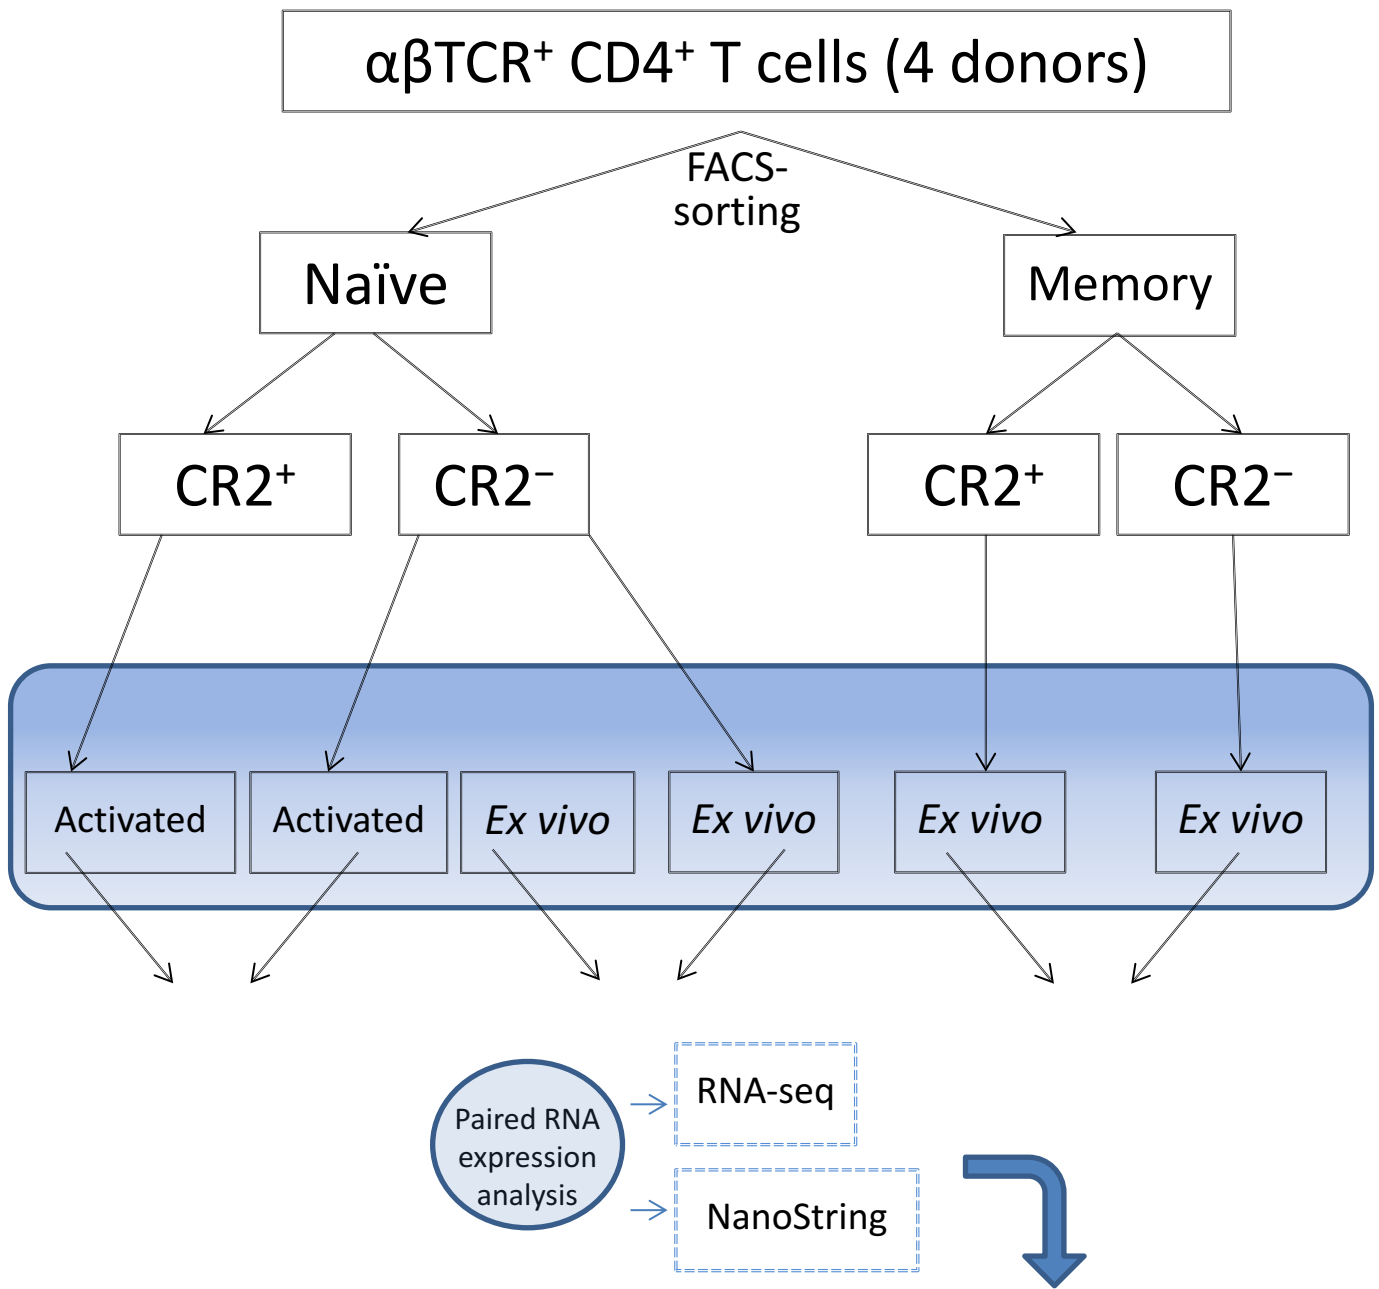

**Supplemental Figure 7. Design of the RNA analysis experiment performed on naïve CR2<sup>+</sup> and CR2<sup>-</sup> and central memory CR2<sup>+</sup> and CR2<sup>-</sup> CD4<sup>+</sup> T cells.** Two RNA analysis methods, RNA-seq and NanoString (Human Immunology gene panel), were applied on paired RNA samples purified from FACS-sorted T-cell subsets from four donors. Fold change (Log<sub>2</sub>) differences obtained from RNA-seq and NanoString were highly correlated (example shown at the bottom right represents fold change between CR2<sup>+</sup> and CR2<sup>-</sup> central memory CD4<sup>+</sup> T cells on both platforms).

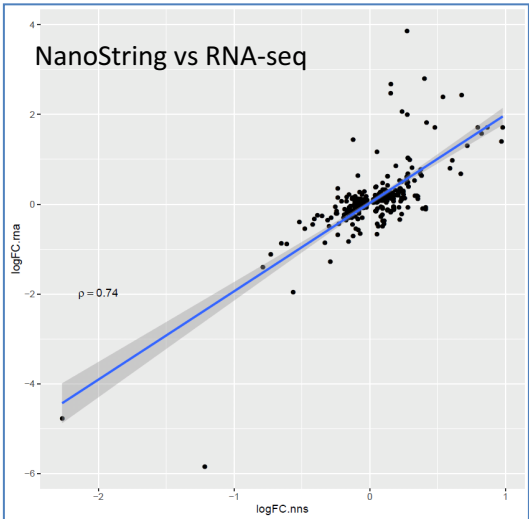



**Supplemental Table 1. Selected results of RNA analysis experiment (RNA-seq) performed on CR2<sup>+</sup> and CR2<sup>-</sup> naïve and memory CD4<sup>+</sup> T cells *ex vivo*.**

| Gene ID                    | Naïve <i>ex vivo</i> |                  |        |                | Memory <i>ex vivo</i> |                  |             |
|----------------------------|----------------------|------------------|--------|----------------|-----------------------|------------------|-------------|
|                            | CR2 <sup>+</sup>     | CR2 <sup>-</sup> |        |                | CR2 <sup>+</sup>      | CR2 <sup>-</sup> |             |
| <b>CR1</b>                 | Donor1               | 271.382*         | 27.106 | FC**           | 1008.486              | 39.988           | FC          |
|                            | Donor2               | 162.204          | 12.753 | 10.204         | 825.464               | 22.576           | 27.027      |
|                            | Donor3               | 180.323          | 9.47   | Adj P value*** | 1374.156              | 37.313           | Adj P value |
|                            | Donor4               | 367.677          | 56.653 | 0.001          | 619.707               | 37.049           | 0.00001     |
| <b>CR2</b>                 | Donor1               | 53.892           | 7.447  | FC             | 53.824                | 0.881            | FC          |
|                            | Donor2               | 41.293           | 3.413  | 10.204         | 33.583                | 0.231            | 58.824      |
|                            | Donor3               | 46.893           | 2.554  | Adj P value    | 55.151                | 1.041            | Adj P value |
|                            | Donor4               | 49.316           | 5.371  | 0.001          | 21.741                | 0.52             | 0.001       |
| <b>ZNF462</b>              | Donor1               | 6.921            | 0.44   | FC             | 31.936                | 4.507            | FC          |
|                            | Donor2               | 3.14             | 0.237  | 12.987         | 17.958                | 0.971            | 7.194       |
|                            | Donor3               | 13.643           | 0.887  | Adj P value    | 24.472                | 4.212            | Adj P value |
|                            | Donor4               | 10.583           | 0.967  | 0.005          | 23.426                | 2.914            | 0.005       |
| <b>CACHD1</b>              | Donor1               | 46.55            | 31.59  | FC             | 1.997                 | 0.102            | FC          |
|                            | Donor2               | 40.215           | 20.102 | 1.757          | 1.395                 | 0.37             | n/a         |
|                            | Donor3               | 33.138           | 13.265 | Adj P value    | 0.423                 | 0.098            | Adj P value |
|                            | Donor4               | 45.642           | 29.65  | 0.037          | 2.467                 | 1.041            | n/a         |
| <b>ADAM23</b>              | Donor1               | 11.703           | 2.482  | FC             | 94.556                | 20.536           | FC          |
|                            | Donor2               | 2.344            | 0.711  | 6.803          | 45.053                | 9.016            | 5.051       |
|                            | Donor3               | 21.67            | 1.561  | Adj P value    | 90.442                | 14.808           | Adj P value |
|                            | Donor4               | 14.583           | 2.578  | 0.02           | 36.686                | 6.765            | 0.00001     |
| <b>PLXNA4</b>              | Donor1               | 12.262           | 2.242  | FC             | 83.232                | 20.638           | FC          |
|                            | Donor2               | 3.562            | 0      | 6.024          | 20.666                | 1.618            | 4.926       |
|                            | Donor3               | 21.494           | 3.866  | Adj P value    | 59.546                | 7.258            | Adj P value |
|                            | Donor4               | 25.493           | 3.867  | 0.02           | 36.034                | 11.188           | 0.014       |
| <b>AOAH</b>                | Donor1               | 19.157           | 9.009  | FC             | 7.017                 | 7.388            | FC          |
|                            | Donor2               | 64.166           | 22.709 | 2.155          | 14.26                 | 9.385            | 1.185       |
|                            | Donor3               | 80.594           | 25.749 | Adj P value    | 12.827                | 13.116           | Adj P value |
|                            | Donor4               | 129.859          | 88.895 | 0.046          | 46.509                | 32.628           | 0.512       |
| <b>CFH</b>                 | Donor1               | 0.037            | 0.08   | FC             | 47.235                | 18.842           | FC          |
|                            | Donor2               | 0.094            | 0.759  | n/a            | 41.539                | 23.903           | 2.653       |
|                            | Donor3               | 0                | 0      | Adj P value    | 45.677                | 10.805           | Adj P value |
|                            | Donor4               | 0                | 0      | n/a            | 58.334                | 19.254           | 0.016       |
| <b>DST</b>                 | Donor1               | 11.404           | 5.966  | FC             | 49.574                | 20.875           | FC          |
|                            | Donor2               | 15.467           | 7.823  | 1.770          | 30.896                | 8.692            | 2.653       |
|                            | Donor3               | 1.653            | 0.816  | Adj P value    | 33.11                 | 10.089           | Adj P value |
|                            | Donor4               | 32.451           | 20.196 | 0.038          | 61.639                | 25.655           | 0.006       |
| <b>ARHGAP32<br/>(RICS)</b> | Donor1               | 37.381           | 24.183 | FC             | 50.943                | 19.79            | FC          |
|                            | Donor2               | 52.589           | 19.39  | 2.105          | 59.209                | 21.083           | 2.427       |
|                            | Donor3               | 49.637           | 18.443 | Adj P value    | 31.417                | 11.391           | Adj P value |
|                            | Donor4               | 55.383           | 28.629 | 0.02           | 35.429                | 19.462           | 0.007       |
| <b>PYHIN1</b>              | Donor1               | 5.516            | 12.772 | FC             | 30.121                | 47.477           | FC          |
|                            | Donor2               | 8.718            | 17.589 | 0.444          | 45.466                | 68.102           | 0.703       |
|                            | Donor3               | 3.694            | 9.151  | Adj P value    | 43.3                  | 51.65            | Adj P value |
|                            | Donor4               | 3.061            | 6.07   | 0.02           | 33.66                 | 44.076           | 0.039       |

\*Gene counts per million reads \*\*FC= Fold change of CR2<sup>+</sup> vs CR2<sup>-</sup> \*\*\*Adj P value= Adjusted P value  
See Methods for analysis of RNA-seq data.

**Supplemental Table 2. Selected results of RNA analysis experiment (NanoString) performed on CR2<sup>+</sup> and CR2<sup>-</sup> naïve CD4<sup>+</sup> T cells after activation.**

| Gene ID |        | Naïve activated  |                  |                |
|---------|--------|------------------|------------------|----------------|
|         |        | CR2 <sup>+</sup> | CR2 <sup>-</sup> |                |
| IL8     | Donor1 | 2529*            | 889              | FC**           |
|         | Donor2 | 69               | 24               | 2.797          |
|         | Donor3 | 140              | 52               | Adj P value*** |
|         | Donor4 | 187              | 50               | 7.36E-21       |
| IL2     | Donor1 | 3937             | 20724            | FC             |
|         | Donor2 | 9108             | 31986            | 0.307          |
|         | Donor3 | 16729            | 40604            | Adj P value    |
|         | Donor4 | 11808            | 40884            | 3.52E-23       |
| IL21    | Donor1 | 3                | 56               | FC             |
|         | Donor2 | 25               | 281              | 0.107          |
|         | Donor3 | 34               | 385              | Adj P value    |
|         | Donor4 | 26               | 341              | 3.19E-52       |
| IFNG    | Donor1 | 9                | 63               | FC             |
|         | Donor2 | 8                | 17               | 0.426          |
|         | Donor3 | 14               | 36               | Adj P value    |
|         | Donor4 | 36               | 84               | 3.11E-04       |
| LIF     | Donor1 | 418              | 769              | FC             |
|         | Donor2 | 319              | 778              | 0.489          |
|         | Donor3 | 305              | 622              | Adj P value    |
|         | Donor4 | 301              | 632              | 3.70E-16       |
| TNF     | Donor1 | 945              | 1130             | FC             |
|         | Donor2 | 641              | 762              | 0.898          |
|         | Donor3 | 1487             | 1353             | Adj P value    |
|         | Donor4 | 1580             | 1914             | 4.06E-01       |
| IL23A   | Donor1 | 578              | 536              | FC             |
|         | Donor2 | 248              | 248              | 1.123          |
|         | Donor3 | 463              | 317              | Adj P value    |
|         | Donor4 | 441              | 430              | 4.68E-01       |
| LTA     | Donor1 | 1115             | 1013             | FC             |
|         | Donor2 | 1182             | 1187             | 1.137          |
|         | Donor3 | 1857             | 1362             | Adj P value    |
|         | Donor4 | 2217             | 1965             | 2.66E-01       |

\*Normalized Counts

\*\*FC=Fold change of CR2<sup>+</sup> vs CR2<sup>-</sup>

\*\*\*Adj P value=Adjusted P value

**Supplemental Table 3. Antibody panels used for immunophenotyping and FACS-sorting.**

| Panel                                                                                                                                           | Antigen                                                                                                                                | Fluorochrome    | Clone ID      | Manufacturer    |
|-------------------------------------------------------------------------------------------------------------------------------------------------|----------------------------------------------------------------------------------------------------------------------------------------|-----------------|---------------|-----------------|
| CR2 Immunophenotyping                                                                                                                           | CD3                                                                                                                                    | BV510           | OKT3          | BioLegend       |
|                                                                                                                                                 | CD4                                                                                                                                    | BUV398          | SK3           | BD Biosciences  |
|                                                                                                                                                 | CD8                                                                                                                                    | APC-Cy7         | RPA-T8        | BioLegend       |
|                                                                                                                                                 | CD56                                                                                                                                   | BV711           | NCAM          | BD Biosciences  |
|                                                                                                                                                 | CD127                                                                                                                                  | PE-Cy7          | eBioRDR5      | eBioscience     |
|                                                                                                                                                 | CD25*                                                                                                                                  | APC             | M-A251+2A3    | BD Biosciences  |
|                                                                                                                                                 | CD45RA                                                                                                                                 | BV785           | HI100         | BioLegend       |
|                                                                                                                                                 | CD62L                                                                                                                                  | BV605           | DREG56        | BD Biosciences  |
|                                                                                                                                                 | CCR7                                                                                                                                   | BV421           | GO43H7        | BioLegend       |
|                                                                                                                                                 | CD27                                                                                                                                   | AlexaFluor700   | M-T271        | BioLegend       |
|                                                                                                                                                 | CD95                                                                                                                                   | PerCP eFluor710 | DX2           | BioLegend       |
|                                                                                                                                                 | CD31                                                                                                                                   | FITC            | WM59          | eBioscience     |
|                                                                                                                                                 | CR2 (CD21)*                                                                                                                            | PE              | BU32+Ly4      | BioLeg+BD Bio   |
| CR1/CR2 Immunophenotyping                                                                                                                       | CD3                                                                                                                                    | BV510           | OKT3          | BioLegend       |
|                                                                                                                                                 | CD4                                                                                                                                    | BUV398          | SK3           | BD Biosciences  |
|                                                                                                                                                 | CD8                                                                                                                                    | APC-Cy7         | RPA-T8        | BioLegend       |
|                                                                                                                                                 | CD56                                                                                                                                   | BV711           | NCAM          | BD Biosciences  |
|                                                                                                                                                 | CD127                                                                                                                                  | PE-Cy7          | eBioRDR5      | eBioscience     |
|                                                                                                                                                 | CD25*                                                                                                                                  | APC             | M-A251+2A3    | BD Biosciences  |
|                                                                                                                                                 | CD45RA                                                                                                                                 | BV785           | HI100         | BioLegend       |
|                                                                                                                                                 | CCR7                                                                                                                                   | BV605           | GO43H7        | BioLegend       |
|                                                                                                                                                 | CD27                                                                                                                                   | AlexaFluor700   | M-T271        | BioLegend       |
|                                                                                                                                                 | CD95                                                                                                                                   | PerCP eFluor710 | DX2           | eBioscience     |
|                                                                                                                                                 | CD31                                                                                                                                   | FITC            | WM59          | eBioscience     |
|                                                                                                                                                 | CR2 (CD21)*                                                                                                                            | PE              | BU32+Ly4      | BioLeg+BD Bio   |
|                                                                                                                                                 | CR1 (CD35)                                                                                                                             | BV421           | E11           | BD Biosciences  |
| FACS sorting of four naïve CD4+ subsets defined by CD25 and CD31 expression using CD4+ TCRab+ cells enriched by negative selection (RosetteSep) | TCRab+                                                                                                                                 | FITC            | IP26          | BioLegend       |
|                                                                                                                                                 | CD4                                                                                                                                    | AF700           | RPA-T4        | BioLegend       |
|                                                                                                                                                 | CD25*                                                                                                                                  | APC             | M-A251+2A3    | BD Biosciences  |
|                                                                                                                                                 | CD127                                                                                                                                  | PE-Cy7          | eBioRDR5      | eBioscience     |
|                                                                                                                                                 | FACS sorting of naïve and memory subsets defined by CR2 expression using CD4+ TCRab+ cells enriched by negative selection (RosetteSep) | CD45RA          | BV785         | HI100           |
| CD31                                                                                                                                            |                                                                                                                                        | PE              | WM59          | BioLegend       |
| CD62L                                                                                                                                           |                                                                                                                                        | BV605           | RPA-T8        | BioLegend       |
| CCR7                                                                                                                                            |                                                                                                                                        | Pacific Blue    | GO43H7        | BioLegend       |
| Viability Dye                                                                                                                                   |                                                                                                                                        | eFluor780       |               | eBioscience     |
| FACS sorting of naïve and memory subsets defined by CR2 expression using CD4+ TCRab+ cells enriched by negative selection (RosetteSep)          | CD4                                                                                                                                    | AF700           | RPA-T4        | BioLegend       |
|                                                                                                                                                 | CD25*                                                                                                                                  | APC             | M-A251+2A3    | BD Biosciences  |
|                                                                                                                                                 | CD127                                                                                                                                  | PE-Cy7          | eBioRDR5      | eBioscience     |
|                                                                                                                                                 | CD45RA                                                                                                                                 | BV785           | HI100         | BioLegend       |
|                                                                                                                                                 | CD62L                                                                                                                                  | BV605           | RPA-T8        | BioLegend       |
|                                                                                                                                                 | CD31                                                                                                                                   | BV421           | WM59          | BioLegend       |
|                                                                                                                                                 | CR2 (CD21)                                                                                                                             | PE              | BU32          | BioLegend       |
| Viability Dye                                                                                                                                   | eFluor780                                                                                                                              |                 | eBioscience   |                 |
| Cytokine production (IL-8 and IL-2) following activation                                                                                        | CD4                                                                                                                                    | AF700           | RPA-T4        | BioLegend       |
|                                                                                                                                                 | CD25*                                                                                                                                  | APC             | M-A251+2A3    | BD Biosciences  |
|                                                                                                                                                 | CD127                                                                                                                                  | PE-Cy7          | eBioRDR5      | eBioscience     |
|                                                                                                                                                 | CD45RA                                                                                                                                 | BV785           | HI100         | BioLegend       |
|                                                                                                                                                 | IL-2                                                                                                                                   | BV510           | MQ1           | BioLegend       |
|                                                                                                                                                 | IL-8                                                                                                                                   | FITC            | E8N1          | BioLegend       |
|                                                                                                                                                 | Viability Dye                                                                                                                          | eFluor780       |               | eBioscience     |
| PTK7 Immunophenotyping                                                                                                                          | PTK7/ CCK-4                                                                                                                            | APC/PE          | 188B          | Miltenyi Biotec |
|                                                                                                                                                 | CD4                                                                                                                                    | BUV398          | SK3           | BD Biosciences  |
|                                                                                                                                                 | CD127                                                                                                                                  | PE-Cy7          | eBioRDR5      | eBioscience     |
|                                                                                                                                                 | CD25*                                                                                                                                  | V421/APC        | M-A251+2A3    | BD Biosciences  |
|                                                                                                                                                 | CD45RA                                                                                                                                 | BV785           | HI100         | BioLegend       |
|                                                                                                                                                 | CD62L                                                                                                                                  | BV605           | DREG56        | BD Biosciences  |
|                                                                                                                                                 | CD95                                                                                                                                   | PerCP eFluor710 | DX2           | BioLegend       |
|                                                                                                                                                 | CD31                                                                                                                                   | FITC            | WM59          | eBioscience     |
| CR2 (CD21)*                                                                                                                                     | PE                                                                                                                                     | BU32+Ly4        | BioLeg+BD Bio |                 |

\*Two clones each of anti-CD25 and anti-CR2 were used to enhance detection.
